# Supplementary material
Source: PubMed Central journal article supplement (PMC6554646)
Supplement: NIHMS1014830-supplement-Appendices.pdf [file NIHMS1014830-supplement-Appendices.pdf]

**eFigure 1.** Example of distributions of the propensity scores including both pre-defined covariates and the high-dimensional propensity score algorithm for the unmatched cohorts from one data partner with a cluster of persons with propensity scores near 1.0 in users of glyburide and without convergence warnings.

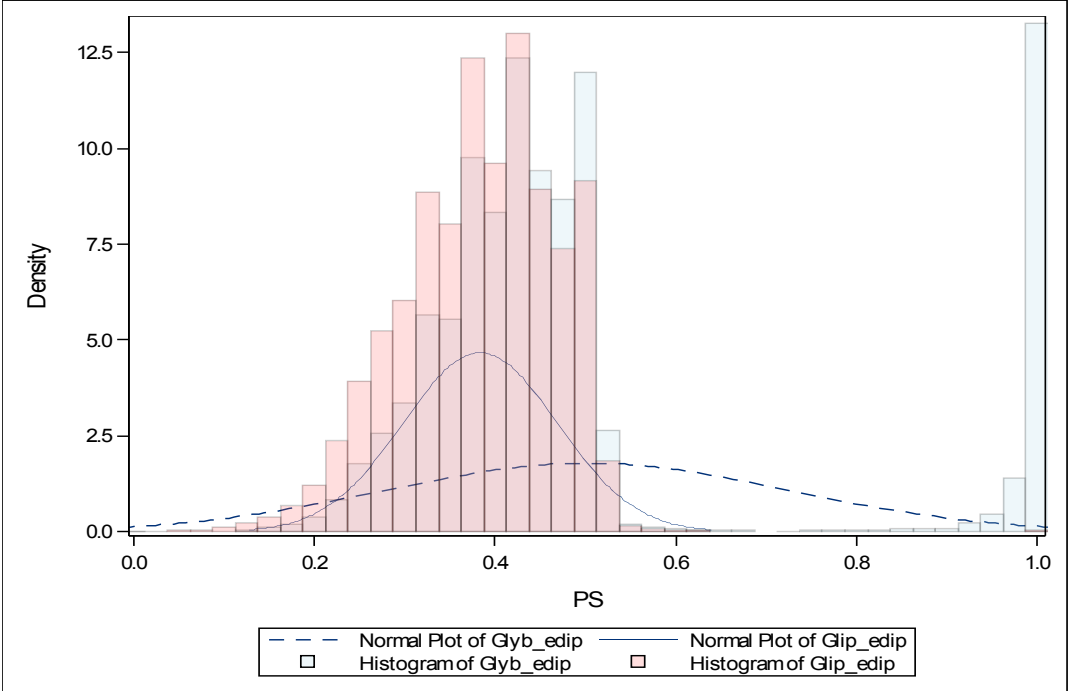

**eFigure 2.** Example of distributions of the propensity scores including both pre-defined covariates and the high-dimensional propensity score algorithm for the unmatched cohorts from one data partner with a cluster of persons with propensity scores near 1.0 in users of glyburide and with convergence warnings.

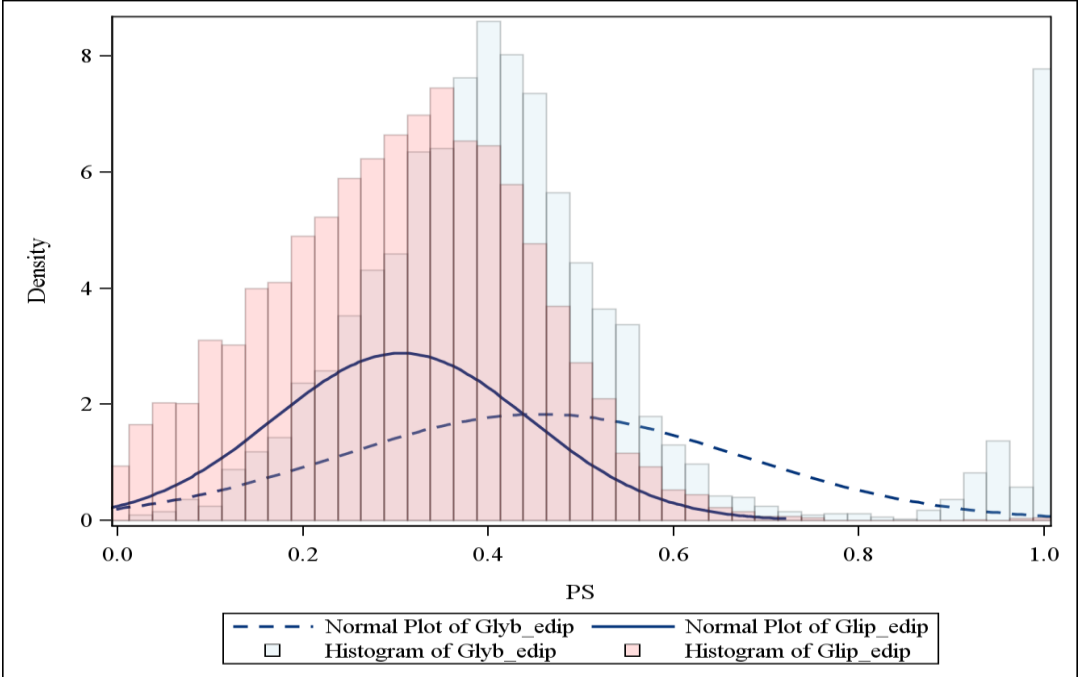

**eFigure 3.** Distributions of the propensity scores including both pre-defined covariates and the high-dimensional propensity score algorithm for the unmatched cohorts from data partner 9.

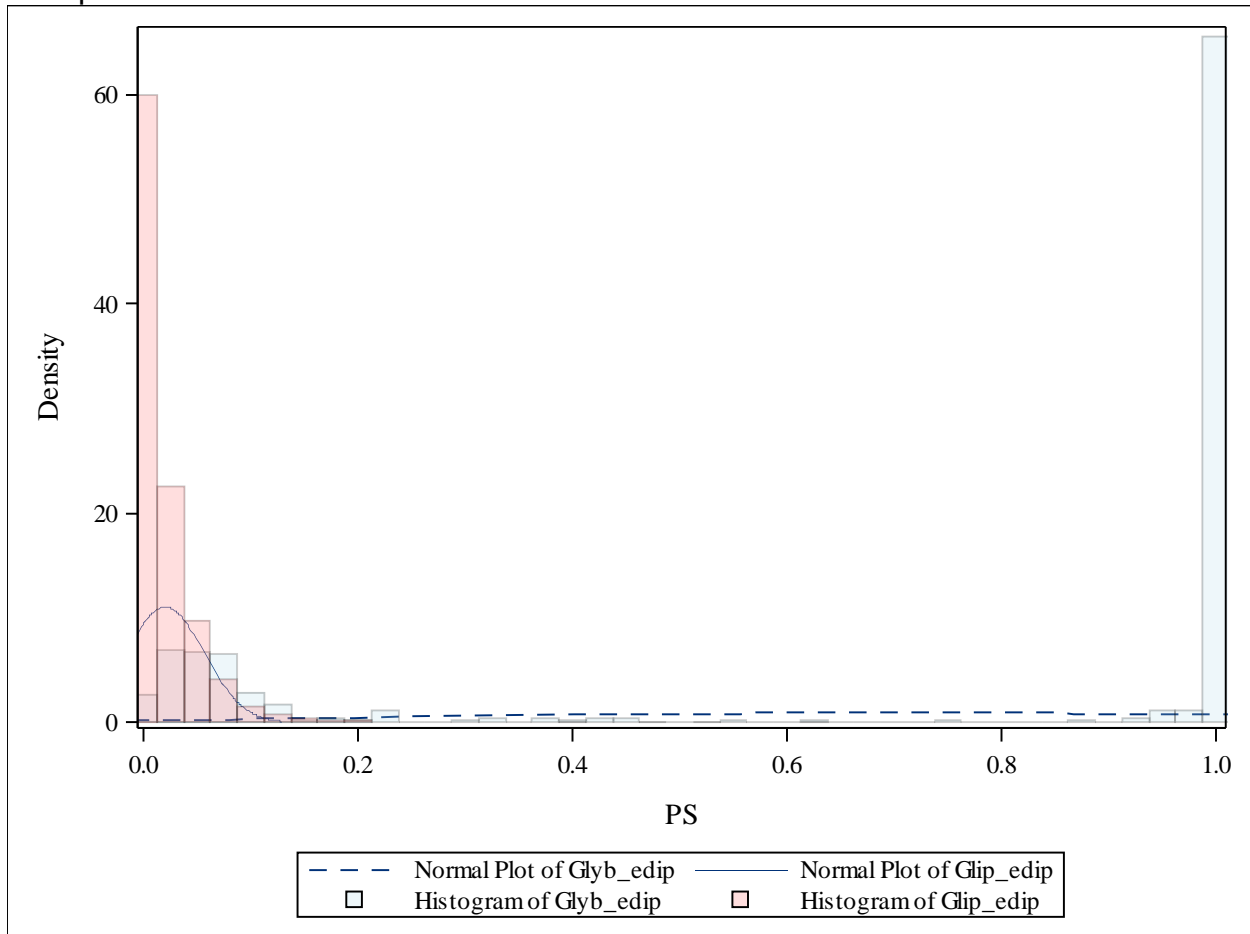

**eFigure 4.** Distributions of the propensity scores including both pre-defined covariates and the high-dimensional propensity score algorithm for the unmatched cohorts from data partner 11.

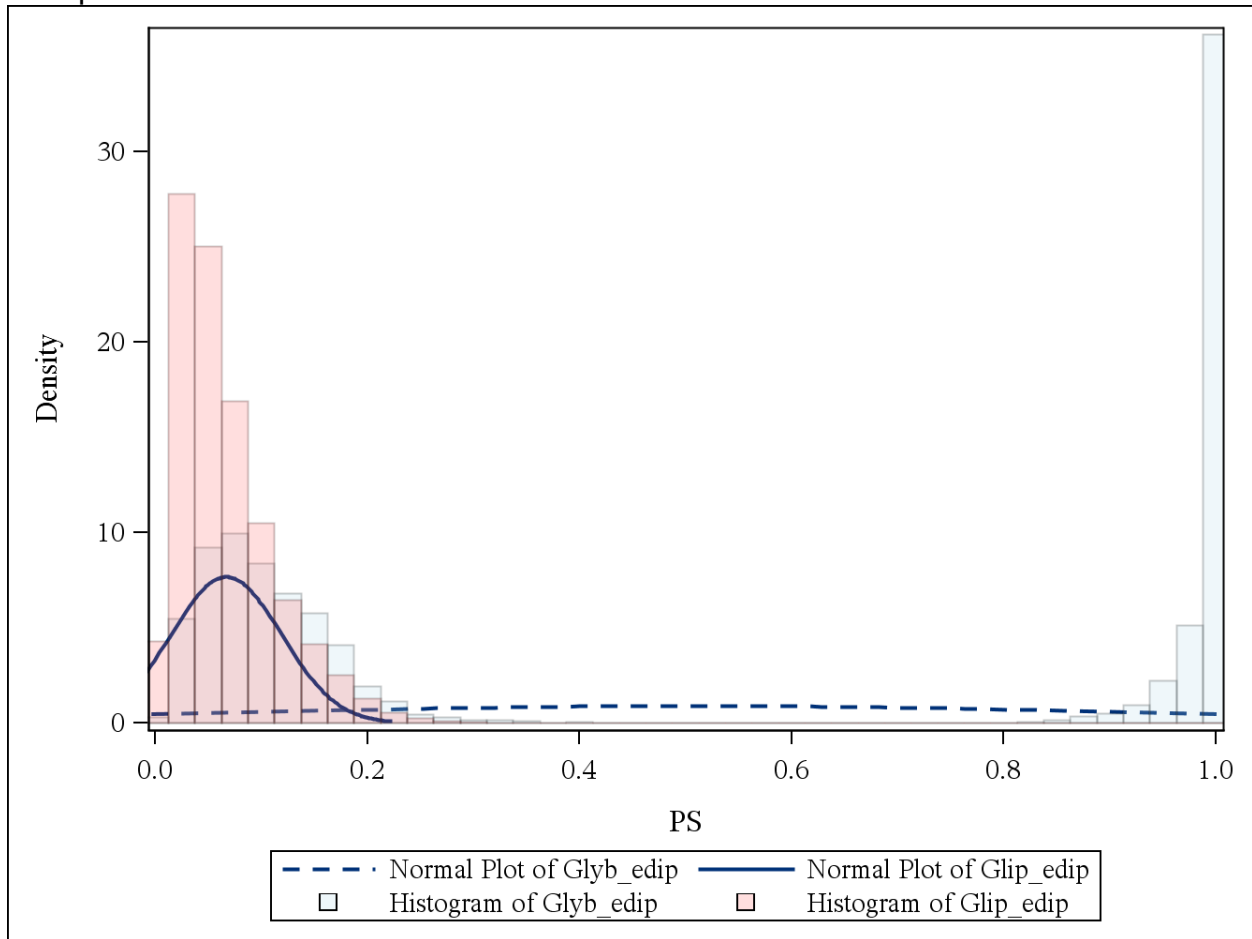

**eTable 1.** International Classification of Diseases, 9<sup>th</sup> revision, Clinical Modification (ICD-9-CM) codes used to identify covariates.

| <b>Covariates</b>      | <b>Position and care setting</b>             | <b>ICD-9 codes</b>                                                                                                                                             |
|------------------------|----------------------------------------------|----------------------------------------------------------------------------------------------------------------------------------------------------------------|
| Chronic Kidney Disease | Any-position diagnosis in all care settings. | 582.xx, 583, 583.0, 583.1, 583.2, 583.4, 583.6, 583.7, 585.x, 586.x, or 588.x                                                                                  |
| Severe Hypoglycemia    | Any-position diagnosis in all care settings. | 251.0, 251.1, 251.2, and 250.8. Exclude the case identified by 250.8 if that was present with a co-diagnosis of 681.xx, 682.xx, 686.90, 707.xx, 730.27, 731.8. |

**eTable 2.** Hazard ratios of emergency department visits and hospital admissions for hypoglycemia by site.

| Hazard Ratio<br>(95%CI) <sup>a, b</sup> | Unmatched           | Predefined covariates –<br>Unconditional model <sup>c</sup> | Predefined covariates<br>– Conditional model <sup>d</sup> | hdPS –<br>Unconditional<br>model <sup>c</sup> | hdPS –<br>Conditional<br>model <sup>d</sup> | Predefined covariates and<br>hdPS – Unconditional<br>model <sup>c</sup> | Predefined covariates<br>and hdPS – Conditional<br>model <sup>d</sup> |
|-----------------------------------------|---------------------|-------------------------------------------------------------|-----------------------------------------------------------|-----------------------------------------------|---------------------------------------------|-------------------------------------------------------------------------|-----------------------------------------------------------------------|
| Data partner 1                          | 1.31 (1.13-1.52)    | 1.47 (1.24, 1.75)                                           | 1.47 (1.18, 1.83)                                         | 1.58 (1.33, 1.88)                             | 1.60 (1.29, 2.00)                           | 1.50 (1.26, 1.78)                                                       | 1.42 (1.14, 1.76)                                                     |
| Data partner 2                          | 1.48 (1.26, 1.74)   | 1.76 (1.46, 2.12)                                           | 1.71 (1.35, 2.18)                                         | 1.71 (1.43, 2.06)                             | 1.61 (1.27, 2.04)                           | 1.79 (1.48, 2.16)                                                       | 1.77 (1.39, 2.26)                                                     |
| Data partner 3                          | 1.18 (0.72, 1.96)   | 1.59 (0.84, 3.01)                                           | 1.67 (0.73, 3.81)                                         | ---                                           | ---                                         | ---                                                                     | ---                                                                   |
| Data partner 4                          | 1.57 (0.86, 2.86)   | 1.53 (0.75, 3.12)                                           | 2.60 (0.93, 7.29)                                         | 1.87 (0.85, 4.08)                             | 1.80 (0.60, 5.37)                           | 2.00 (0.92, 4.34)                                                       | 2.40 (0.85, 6.81)                                                     |
| Data partner 5                          | 1.61 (0.80, 3.23)   | 1.33 (0.54, 3.27)                                           | 1.75 (0.51, 5.98)                                         | ---                                           | ---                                         | ---                                                                     | ---                                                                   |
| Data partner 6                          | 17.72 (2.04, 153.9) | 6.60 (0.75, 58.07)                                          | 72^13 (0.00, .)                                           | ---                                           | ---                                         | ---                                                                     | ---                                                                   |
| Data partner 7                          | 1.09 (0.54, 2.20)   | 1.41 (0.59, 2.88)                                           | 0.71 (0.23, 2.25)                                         | 1.19 (0.43, 3.27)                             | 1.25 (0.34, 4.65)                           | 1.19 (0.43, 3.27)                                                       | 1.50 (0.42, 5.32)                                                     |
| Data partner 8                          | 1.32 (1.19, 1.47)   | 1.38 (1.23, 1.56)                                           | 1.41 (1.21, 1.64)                                         | ---                                           | ---                                         | ---                                                                     | ---                                                                   |
| Data partner 9                          | 0.44 (0.66, 3.23)   | 1.03 (0.06, 16.51)                                          | . (. , .)                                                 | ---                                           | ---                                         | ---                                                                     | ---                                                                   |
| Data partner 10                         | 3.33 (1.27, 8.72)   | 2.30 (0.53, 9.91)                                           | 4.00 (0.45, 35.79)                                        | ---                                           | ---                                         | ---                                                                     | ---                                                                   |
| Data partner 11                         | 0.55 (0.47, 0.65)   | 0.96 (0.77, 1.19)                                           | 0.85 (0.63, 1.13)                                         | ---                                           | ---                                         | ---                                                                     | ---                                                                   |
| Data partner 12                         | 3.52 (1.28, 9.68)   | 2.90 (0.51, 16.34)                                          | 1.00 (0.14, 7.10)                                         | ---                                           | ---                                         | ---                                                                     | ---                                                                   |
| Data partner 13                         | 1.03 (0.88, 1.21)   | 1.10 (0.92, 1.31)                                           | 1.16 (0.93, 1.45)                                         | 1.24 (1.04, 1.49)                             | 1.29 (1.04, 1.61)                           | 1.24 (1.04, 1.49)                                                       | 1.29 (1.04, 1.61)                                                     |

hdPS – High-dimensional propensity score, CI – Confidence interval.

<sup>a</sup> Hazard ratios comparing glyburide versus. glipizide.

<sup>b</sup> Please note, one data partner removed a small number of users that moved to administrative services only plans. Information from these users is included in Tables 1 and 2, but removed from subsequent tables.

<sup>c</sup> The conditional models were stratified by the matched pair.

<sup>d</sup> The unconditional models were not stratified by the matched pair.

**eTable 3.** Top ten variables that most strongly predicted glyburide exposure selected by the high-dimensional propensity score algorithm from one data partner with a cluster of persons with propensity scores near 1.0 in users of glyburide and without convergence warnings.

| Code Type | Code   | Concept                                                                                                                                                                                                             |
|-----------|--------|---------------------------------------------------------------------------------------------------------------------------------------------------------------------------------------------------------------------|
| CPT       | 0502F  | Subsequent prenatal care visit (prenatal)                                                                                                                                                                           |
| ICDDX     | 648.83 | Abnormal glucose tolerance of mother, complicating pregnancy, childbirth, or the puerperium, antepartum condition or complication                                                                                   |
| CPT       | 82950  | Glucose; post glucose dose (includes glucose)                                                                                                                                                                       |
| CPT       | 0502F  | Subsequent prenatal care visit (prenatal)                                                                                                                                                                           |
| ICDDX     | V22.2  | Pregnant state, incidental                                                                                                                                                                                          |
| CPT       | 0501F  | Prenatal flow sheet documented in medical record by first prenatal visit (documentation includes at minimum blood pressure, weight, urine protein, uterine size, fetal heart tones, and estimated date of delivery) |
| ICDDX     | V22.2  | Pregnant state, incidental                                                                                                                                                                                          |
| ICDDX     | 648.83 | Abnormal glucose tolerance of mother, complicating pregnancy, childbirth, or the puerperium, antepartum condition or complication                                                                                   |
| ICDDX     | V22.2  | Pregnant state, incidental                                                                                                                                                                                          |
| ICDDX     | 648.83 | Abnormal glucose tolerance of mother, complicating pregnancy, childbirth, or the puerperium, antepartum condition or complication                                                                                   |

ICDDX – *International Classification of Disease, 9<sup>th</sup> revision, Clinical Modification (ICD-9-CM)* diagnoses; CPT – Current Procedural Terminology.

**eTable 4.** Top ten variables that most strongly predicted glyburide exposure selected by the high-dimensional propensity score algorithm from one data partner with a cluster of persons with propensity scores near 1.0 in users of glyburide and with convergence warnings.

| Code Type | Code   | Concept                                                                                                                                                                   |
|-----------|--------|---------------------------------------------------------------------------------------------------------------------------------------------------------------------------|
| ICDDX     | V22.1  | Supervision of other normal pregnancy                                                                                                                                     |
| ICDDX     | 648.83 | Abnormal glucose tolerance of mother, complicating pregnancy, childbirth, or the puerperium, antepartum condition or complication                                         |
| ICDDX     | 648.83 | Abnormal glucose tolerance of mother, complicating pregnancy, childbirth, or the puerperium, antepartum condition or complication                                         |
| ICDDX     | V22.1  | Supervision of other normal pregnancy                                                                                                                                     |
| ICDDX     | 648.83 | Abnormal glucose tolerance of mother, complicating pregnancy, childbirth, or the puerperium, antepartum condition or complication                                         |
| ICDDX     | V22.1  | Supervision of other normal pregnancy                                                                                                                                     |
| ICDPX     | 966    | Enteral infusion of concentrated nutritional substances                                                                                                                   |
| HCPCS     | Q4081  | Injection, epoetin alfa, 100 units (for ERSD dialysis)                                                                                                                    |
| HCPCS     | P9604  | Travel allowance one way in connection with medically necessary laboratory specimen collection drawn from home bound or nursing home bound patient; prorated trip charge. |
| ICDPX     | 9390   | Non-invasive mechanical ventilation                                                                                                                                       |

ICDDX – *International Classification of Disease, 9<sup>th</sup> revision, Clinical Modification (ICD-9-CM)* diagnoses; ICDPX – *International Classification of Disease, 9<sup>th</sup> edition (ICD-9)* procedures; HCPCS – *Healthcare Common Procedure Coding System* procedures.



**eTable 5.** Top ten variables that most strongly predicted glyburide exposure selected by the high-dimensional propensity score algorithm from data partner 9.

| Code Type | Code   | Concept                                                                                                                                                                                                             |
|-----------|--------|---------------------------------------------------------------------------------------------------------------------------------------------------------------------------------------------------------------------|
| CPT       | 0502F  | Subsequent prenatal care visit (prenatal)                                                                                                                                                                           |
| ICDDX     | 648.83 | Abnormal glucose tolerance of mother, complicating pregnancy, childbirth, or the puerperium, antepartum condition or complication                                                                                   |
| CPT       | 82950  | Glucose; post glucose dose (includes glucose)                                                                                                                                                                       |
| CPT       | 0502F  | Subsequent prenatal care visit (prenatal)                                                                                                                                                                           |
| ICDDX     | V22.2  | Pregnant state, incidental                                                                                                                                                                                          |
| CPT       | 0501F  | Prenatal flow sheet documented in medical record by first prenatal visit (documentation includes at minimum blood pressure, weight, urine protein, uterine size, fetal heart tones, and estimated date of delivery) |
| ICDDX     | V22.2  | Pregnant state, incidental                                                                                                                                                                                          |
| ICDDX     | 648.83 | Abnormal glucose tolerance of mother, complicating pregnancy, childbirth, or the puerperium, antepartum condition or complication                                                                                   |
| ICDDX     | V22.2  | Pregnant state, incidental                                                                                                                                                                                          |
| ICDDX     | 648.83 | Abnormal glucose tolerance of mother, complicating pregnancy, childbirth, or the puerperium, antepartum condition or complication                                                                                   |

ICDDX – *International Classification of Disease, 9<sup>th</sup> revision, Clinical Modification (ICD-9-CM)* diagnoses; CPT – Current Procedural Terminology.

**eTable 6.** Top ten variables that most strongly predicted glyburide exposure selected by the high-dimensional propensity score algorithm from data partner 11.

| Code Type | Code   | Concept                                                                                                                                          |
|-----------|--------|--------------------------------------------------------------------------------------------------------------------------------------------------|
| ICDDX     | 648.80 | Abnormal glucose tolerance of mother, complicating pregnancy, childbirth, or the puerperium, unspecified as to episode of care or not applicable |
| ICDDX     | 648.80 | Abnormal glucose tolerance of mother, complicating pregnancy, childbirth, or the puerperium, unspecified as to episode of care or not applicable |
| ICDDX     | V22.1  | Supervision of other normal pregnancy                                                                                                            |
| ICDDX     | V22.1  | Supervision of other normal pregnancy                                                                                                            |
| ICDDX     | 648.80 | Abnormal glucose tolerance of mother, complicating pregnancy, childbirth, or the puerperium, unspecified as to episode of care or not applicable |
| ICDDX     | V22.1  | Supervision of other normal pregnancy                                                                                                            |
| HCPCS     | J2790  | Injection, rho d immune globulin, human, full dose, 300 micrograms (1500 i.u.)                                                                   |
| ICDPX     | 7534   | Other fetal monitoring                                                                                                                           |
| HCPCS     | J3490  | Unclassified drugs                                                                                                                               |
| HCPCS     | J0702  | Injection, betamethasone acetate 3mg and betamethasone sodium phosphate 3mg                                                                      |

ICDDX – *International Classification of Disease, 9<sup>th</sup> revision, Clinical Modification (ICD-9-CM)* diagnoses; ICDPX – *International Classification of Disease, 9<sup>th</sup> edition (ICD-9)* procedures; HCPCS – Healthcare Common Procedure Coding System procedures.

eTable 7. Incidence rates and hazard ratios of emergency department visits for hypoglycemia.

| Exposure                                                                                        | New users <sup>a</sup> | Person Years at risk | Serious hypoglycemia events | Incidence rate per 1,000<br>person years | Hazard Ratio<br>(95% CI) |
|-------------------------------------------------------------------------------------------------|------------------------|----------------------|-----------------------------|------------------------------------------|--------------------------|
| <b>Data from 13 Data Partners</b>                                                               |                        |                      |                             |                                          |                          |
| Unmatched <sup>b</sup>                                                                          |                        |                      |                             |                                          |                          |
| Glyburide                                                                                       | 199,019                | 90,306               | 325                         | 3.6                                      | 1.30 (1.13, 1.50)        |
| Glipizide                                                                                       | 380,869                | 247,580              | 912                         | 3.7                                      |                          |
| Predefined covariates - Unconditional model <sup>c</sup>                                        |                        |                      |                             |                                          |                          |
| Glyburide                                                                                       | 174,131                | 83,640               | 309                         | 3.7                                      | 1.62 (1.51, 2.38)        |
| Glipizide                                                                                       | 174,132                | 100,084              | 216                         | 2.2                                      |                          |
| Predefined covariates – Conditional model <sup>d</sup>                                          |                        |                      |                             |                                          |                          |
| Glyburide                                                                                       | 174,131                | 39,151               | 218                         | 5.6                                      | 1.90 (1.51, 2.38)        |
| Glipizide                                                                                       | 174,132                | 39,152               | 115                         | 2.9                                      |                          |
| <b>Data from 5 Data Partners in which the hdPS model converged and completed without errors</b> |                        |                      |                             |                                          |                          |
| Unmatched <sup>b</sup>                                                                          |                        |                      |                             |                                          |                          |
| Glyburide                                                                                       | 139,449                | 58,391               | 216                         | 3.7                                      | 1.61 (1.33, 1.95)        |
| Glipizide                                                                                       | 182,496                | 95,482               | 205                         | 2.1                                      |                          |
| Predefined covariates - Unconditional model <sup>c</sup>                                        |                        |                      |                             |                                          |                          |
| Glyburide                                                                                       | 120,687                | 53,640               | 202                         | 3.8                                      | 1.76 (1.41, 2.20)        |
| Glipizide                                                                                       | 120,688                | 61,404               | 126                         | 2.1                                      |                          |
| Predefined covariates – Conditional model <sup>d</sup>                                          |                        |                      |                             |                                          |                          |
| Glyburide                                                                                       | 120,687                | 24,733               | 138                         | 5.6                                      | 2.09 (1.56, 2.80)        |
| Glipizide                                                                                       | 120,688                | 24,733               | 66                          | 2.7                                      |                          |
| hdPS – Unconditional model <sup>c</sup>                                                         |                        |                      |                             |                                          |                          |
| Glyburide                                                                                       | 117,271                | 53,120               | 199                         | 3.7                                      | 1.93 (1.54, 2.44)        |
| Glipizide                                                                                       | 117,273                | 62,638               | 115                         | 1.8                                      |                          |
| hdPS – Conditional model <sup>d</sup>                                                           |                        |                      |                             |                                          |                          |
| Glyburide                                                                                       | 117,271                | 24,690               | 125                         | 5.1                                      | 1.89 (1.41, 2.55)        |

|                                                                   |         |        |     |     |                   |
|-------------------------------------------------------------------|---------|--------|-----|-----|-------------------|
| Glipizide                                                         | 117,273 | 24,691 | 66  | 2.7 |                   |
| Predefined covariates and hdPS – Unconditional model <sup>c</sup> |         |        |     |     |                   |
| Glyburide                                                         | 116,929 | 52,995 | 193 | 3.6 | 1.69 (1.35, 2.12) |
| Glipizide                                                         | 116,930 | 61,780 | 127 | 2.1 |                   |
| Predefined covariates and hdPS – Conditional model <sup>d</sup>   |         |        |     |     |                   |
| Glyburide                                                         | 116,929 | 24,406 | 122 | 5.0 | 1.94 (1.43, 2.62) |
| Glipizide                                                         | 116,930 | 24,406 | 63  | 2.6 |                   |

hdPS – High dimensional propensity score; SD – Standard deviation.

<sup>a</sup> Please note, one Data Partner removed a small number of users that moved to administrative services only plans. Information from these users is included in Tables 1 and 2, but removed from subsequent tables.

<sup>b</sup> Please note, all models were stratified by Data Partner.

<sup>c</sup> The conditional models were stratified by the matched pair.

<sup>d</sup> The unconditional models were not stratified by the matched pair.
